# Supplementary material for: Evaluation of a GSH-targeting prodrug via a sulfonamide-induced “integrative” platform for selective cancer therapy
Source: Royal Society of Chemistry journal article supplement (doi:10.1039/d0an00627k), 2020-01-01
Supplement: d0an00627k1.pdf [file d0an00627k1.pdf]

**Supporting Information for**

**Evaluation of GSH-generating prodrug via sulfonamide-**

**induced “integrative” platform for selective cancer therapy**

Jun Liu\*, Cheng Cao

*College of Chemistry and Chemical Engineering, Hexi University, Zhangye City 734000,*

*Gansu Province, P. R. China*

\*Corresponding Author; Email: liujun3622849@163.com

## **Table of contents**

- 1. Synthesis of fluorescent probes (LHX)**
- 2. Mass spectra and NMR characterizations of synthesized compounds (S3–S8)**
- 3. Supplementary data (S9–S10).**

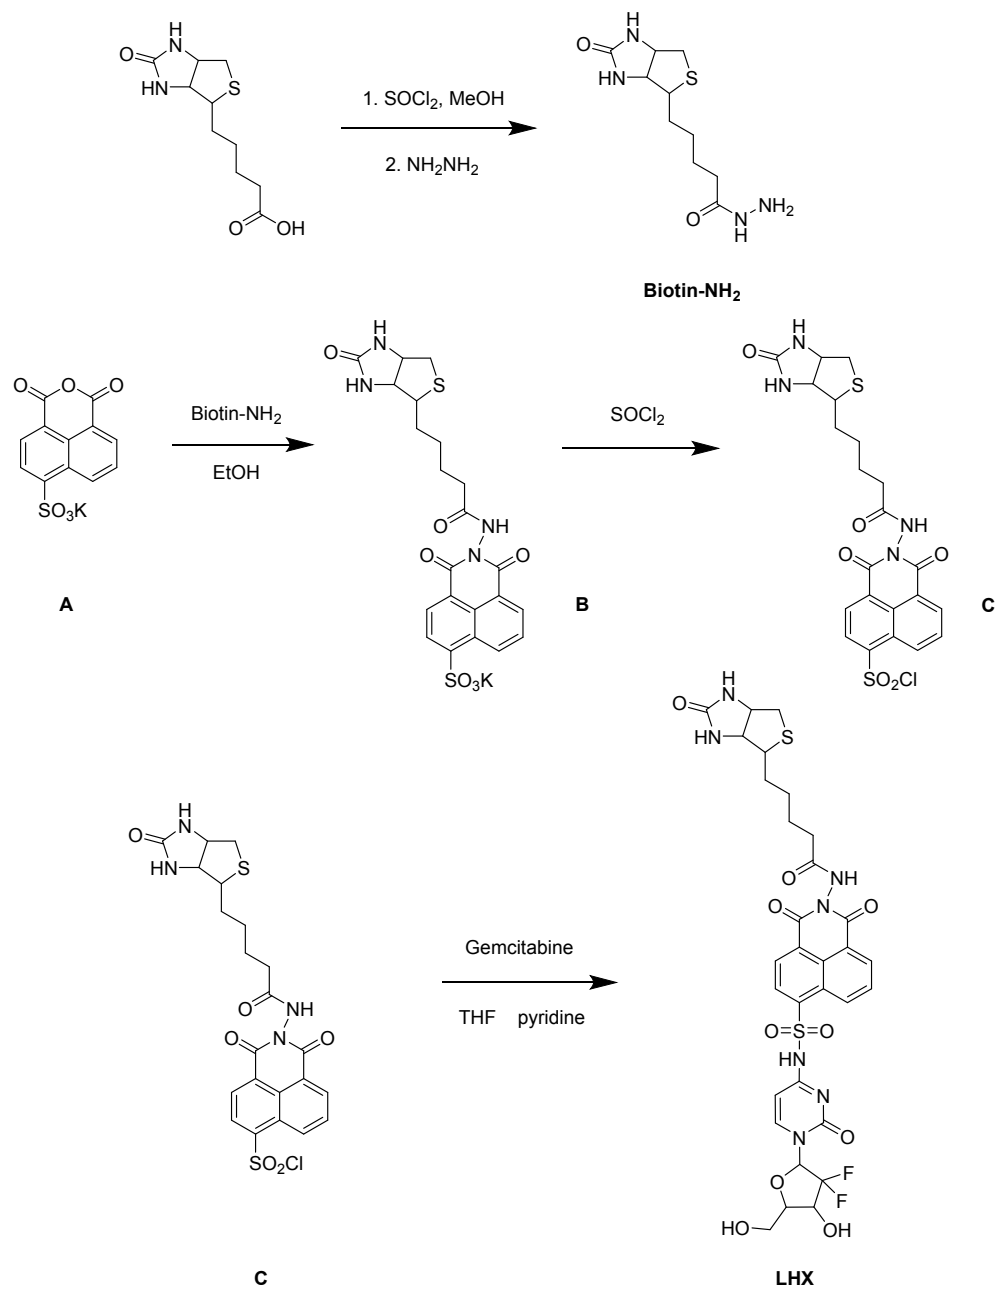

**Scheme S1.** Synthesis of LHX

## Synthesis of B

To a solution of 4-sulfo-1,8-naphthalic anhydride potassium salt (2 g, 6 mmol) in ethanol (100 ml) under an argon atmosphere was added Biotin-NH<sub>2</sub> (3.1 g, 12 mmol). After the reaction mixture was refluxed for 2.5 h, the residue was cooled to room temperature, filtered and washed with ethanol. The obtained cream residue B in 63% yield was without further purified according to the previous literatures. <sup>1</sup>H NMR (500 MHz, DMSO)  $\delta$  10.21 (s, 2H), 8.93 (s, 1H), 8.58 (d,  $J$  = 0.9 Hz, 1H), 8.56 (d,  $J$  = 7.6 Hz, 1H), 8.34 (s, 1H), 8.24 (s, 1H), 8.01 (s, 1H), 4.33 (m, 1H), 4.13 (s, 2H), 3.58 (s, 1H), 2.73 (s, 1H), 2.00 (d,  $J$  = 7.5 Hz, 2H), 1.61 (d,  $J$  = 2.5 Hz, 2H), 1.50 (d,  $J$  = 7.3 Hz, 2H), 1.26 (d,  $J$  = 9.7 Hz, 2H). ESI-MS:  $m/z$  calcd for [C<sub>22</sub>H<sub>21</sub>KN<sub>4</sub>O<sub>7</sub>S<sub>2</sub>]<sup>+</sup>, 556.05; found, 557.3 (M)<sup>+</sup>.

## Synthesis of C, LHX

To a solution of B (473 mg, 0.85 mmol) under an argon atmosphere was added  $\text{SOCl}_2$  (20 ml) and a catalytic amount of DMF. After the result solution was refluxed for 12 h, the solvent removal under reduced pressure. The residue C was used directly to the next reaction. To a solution of benzylamine (224 mg, 0.85mmol) in anhydrous THF (20 ml) under argon atmosphere was added the pyridine (2 ml). After the reaction mixture was stirred for 10 min, a solution of C (456 mg, 0.85 mmol) in THF (20 ml) was added dropwise at  $0^\circ\text{C}$ . After the result solution was refluxed for 12 h, the solvent removal under reduced pressure. The residue was purified by silica column hexane: dichloromethane=1:9 to obtain LHX (374 mg, 0.49 mmol) as pale-yellow solid in 61% yield.  $^1\text{H}$  NMR (500 MHz, DMSO)  $\delta$  12.02 (s, 1H), 9.32 (d,  $J$  = 8.6 Hz, 1H), 8.51 (d,  $J$  = 7.6 Hz, 1H), 8.26 (d,  $J$  = 7.5 Hz, 1H), 7.94 (s, 1H), 7.71 (d,  $J$  = 7.5 Hz, 1H), 7.44 (s, 1H), 6.46 (s, 1H), 6.40 (s, 1H), 6.26 (s, 1H), 6.14 (s, 1H), 5.82 (d,  $J$  = 7.5 Hz, 1H), 5.22 (s, 1H), 4.32 (s, 2H), 4.15 (s, 2H), 3.78 (d,  $J$  = 16.0 Hz, 2H), 3.63 (d,  $J$  = 12.1 Hz, 1H), 3.40 (s, 2H), 3.11 (d,  $J$  = 7.4 Hz, 1H), 2.81 (s, 1H), 2.59 (d,  $J$  = 12.4 Hz, 1H), 2.21 (t,  $J$  = 7.4 Hz, 2H), 1.51 (d,  $J$  = 8.1 Hz, 2H), 1.34 (d,  $J$  = 15.3 Hz, 2H). ESI-MS:  $m/z$  calcd for  $[\text{C}_{31}\text{H}_{31}\text{F}_2\text{N}_7\text{O}_{10}\text{S}_2]^+$ , 763.15; found, 764.3 (M) $^+$ .

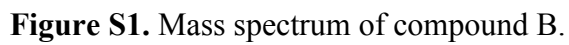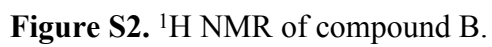

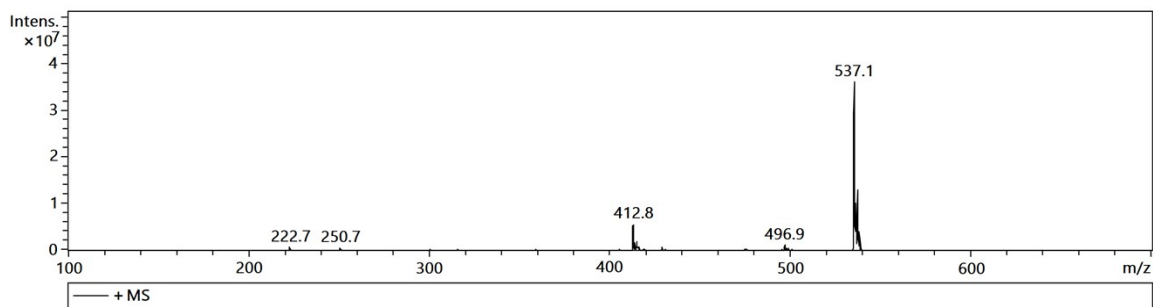

**Figure S3.** Mass spectrum of compound C.

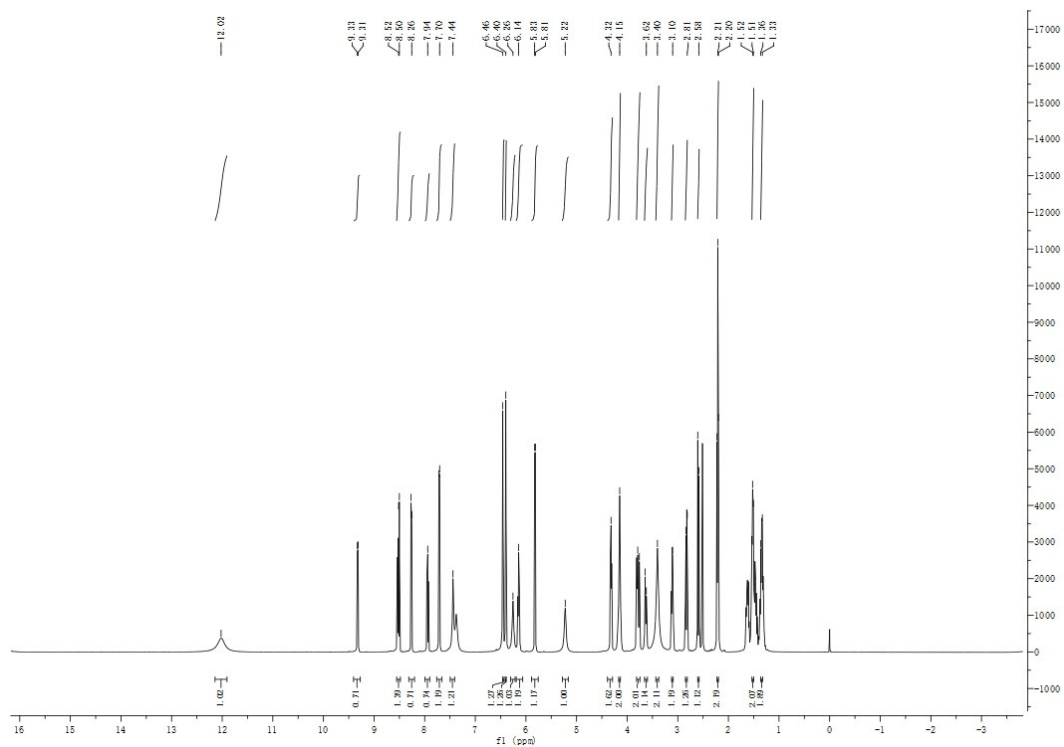

**Figure S4.**  $^1\text{H}$  NMR of compound LHX.

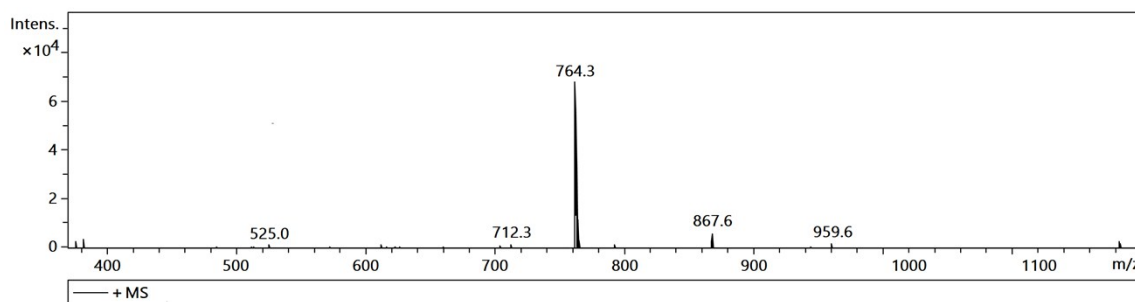

**Figure S5.** Mass spectrum of compound LHX.

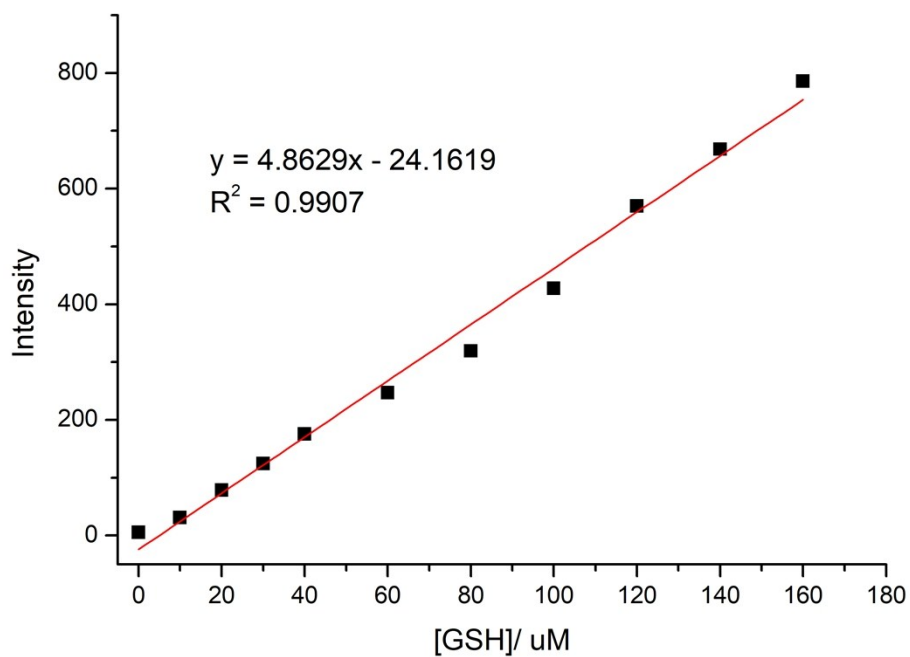

**Figure S6.** Plots of fluorescent intensity of LHX as a function of GSH concentrations.

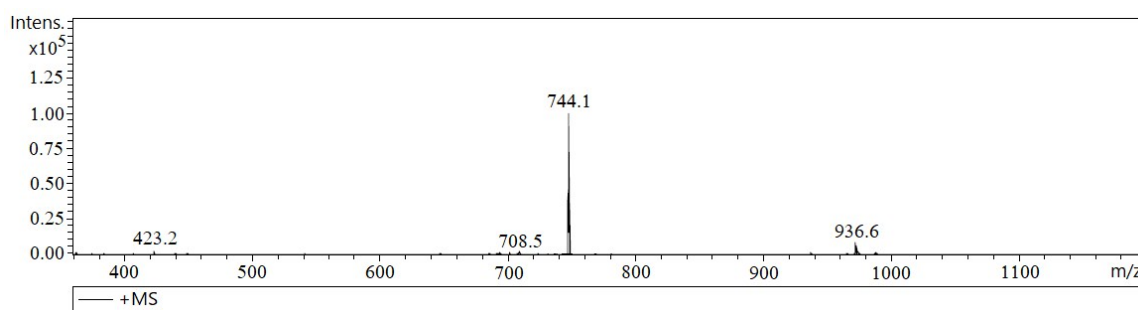

**Figure S7.** Mass spectrum of the product.

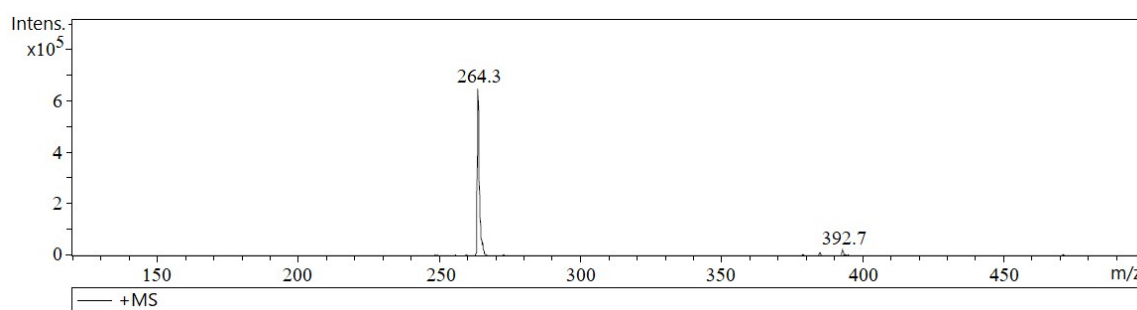

**Figure S8.** Mass spectrum of the gemcitabine.

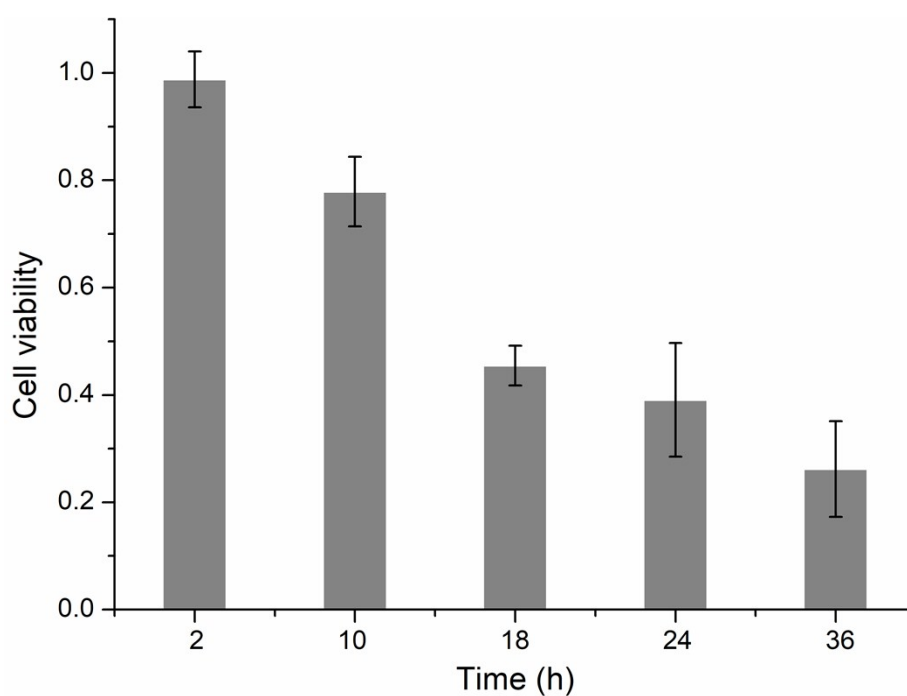

**Figure S9.** Time-dependent viability of HeLa cells treated with LHX (5.0  $\mu\text{M}$  in PBS pH = 7.4).
